# Supplementary material for: Multi-scale ensemble model for dMMR prediction from histopathological images of colorectal cancer
Source: Research Square preprint supplement (doi:10.21203/rs.3.rs-5677679/v1), 2025-01-02
Supplement: Supplementary file 1 [file 6fec8f1efd88a7f915dfd0ed.pdf]

# Supplementary information

**Table 1** Comparison of CNN architectures

| Architecture      | Learning rate | Optimizing function | Tile-level accuracy | Time per epoch |
|-------------------|---------------|---------------------|---------------------|----------------|
| ResNet18          | 4e-3          | Adam                | 74.5 %              | 5 min          |
| ViT               | 1e-4          | Adam                | 75.7 %              | 5 min          |
| <b>ConvNeXt</b>   | <b>4e-3</b>   | <b>Adam</b>         | <b>81.0 %</b>       | <b>20 min</b>  |
| <b>MobilNetV3</b> | <b>1e-3</b>   | <b>Adam</b>         | <b>79.3 %</b>       | <b>3 min</b>   |

Four architectures for comparison were chosen based on the literature. Training data included 10.000 image patches, and testing data 5.000 image patches. The two best-performing architectures at the tile level were ConvNeXt and MobileNetV3, the latter of which was chosen based on the lighter computational load.

**Table 2** Hyperparameters of the individual models

| Model   | Learning rate | Optimizing function |
|---------|---------------|---------------------|
| TUM5x   | 1e-3          | Adam                |
| TUM20x  | 5e-2          | SGD                 |
| OTHER5x | 1e-2          | Adam                |

The hyperparameters were chosen with 5-fold cross-validation on the validation data.

**Table 3** Hyperparameters of the XGBoost layer

| Model       | Estimators | Depth | Learning rate | Objective         | Scale | Subsample |
|-------------|------------|-------|---------------|-------------------|-------|-----------|
| XGBoost-5x  | 120        | 3     | 2e-2          | 'binary:logistic' | 4.5   | 0.1       |
| XGBoost-20x | 65         | 3     | 2e-2          | 'binary:logistic' | 4.5   | 0.1       |

Hyperparameters of the XGBoost models of the two branches (5x and 20x). Depth = maximum depth of the tree, objective = the objective function, scale = scaling factor in the case of imbalanced data, subsample = subsample ratio of the training instances. All other parameters were set to their default values.
